# Supplementary material for: Conjugated coupler curvature enhances magnetic spin coupling in π-diradicals
Source: Royal Society of Chemistry journal article supplement (doi:10.1039/d3nj04147f), 2023-01-01
Supplement: d3nj04147f1.pdf [file d3nj04147f1.pdf]

## Conjugated Coupler Curvature Enhances Magnetic Spin Coupling in $\pi$ -Diradicals

Shaofen Yu, Yamin Song, Yuxiang Bu, Xinyu Song\*

*School of Chemistry and Chemical Engineering, Shandong University, Jinan 250100,  
People's Republic of China*

### Supporting Information

1. The structures of all diradicals.
2.  $E_{BS}$ ,  $E_T$ ,  $\langle S^2 \rangle$  values, and  $J$  values of a calculated at the (U)M06-2X/6-311G (d, p) and (U)WB97XD/6-311++G (d, p) levels.
3. The geometry character of diradicals.
4. The ground state spin density distribution (isovalue =0.001) of the diradicals.
5. The SOMO ( $\alpha$ ,  $\beta$ ) (isovalue =0.02)
6. AV1245 value of benzene ring in diradicals.
7. Orbital energy of the diradicals in the CS state.

1. The structures of all diradicals.

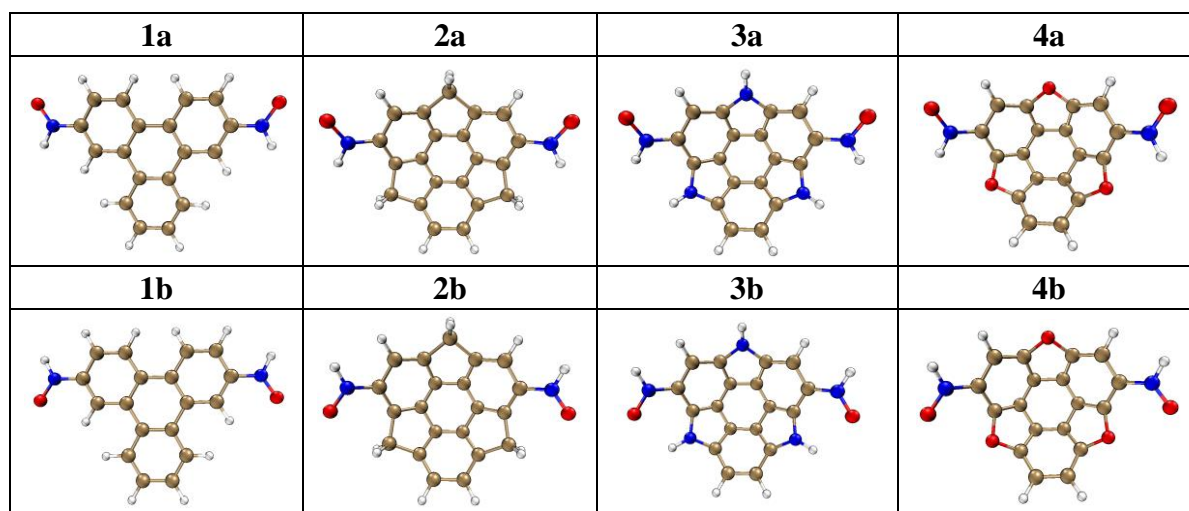

2.  $E_{BS}$ ,  $E_T$ ,  $\langle S^2 \rangle$  values, and  $J$  values of a calculated at the (U)M06-2X/6-311G (d, p) and (U)WB97XD/6-311++G (d, p) levels

|                           |           | $E_{BS}/a.u.$ | $\langle S^2 \rangle$ | $E_T/a.u.$    | $\langle S^2 \rangle$ | $J/cm^{-1}$ |
|---------------------------|-----------|---------------|-----------------------|---------------|-----------------------|-------------|
| (U)M06-2X/6-311G (d, p)   | <b>1a</b> | -952.8326374  | 1.024                 | -952.8310671  | 2.017                 | -346.8      |
|                           | <b>2a</b> | -1067.0745126 | 1.027                 | -1067.0726244 | 2.021                 | -417.2      |
|                           | <b>3a</b> | -1115.1869189 | 1.030                 | -1115.1846028 | 2.022                 | -512.2      |
|                           | <b>4a</b> | -1174.7420384 | 1.032                 | -1174.7397592 | 2.024                 | -504.2      |
| (U)WB97XD/6-311++G (d, p) | <b>1a</b> | -952.8981916  | 1.051                 | -952.8962026  | 2.026                 | -448.1      |
|                           | <b>2a</b> | -1067.1442895 | 1.064                 | -1067.1417695 | 2.032                 | -571.3      |
|                           | <b>3a</b> | -1115.2454184 | 1.066                 | -1115.2422373 | 2.032                 | -722.7      |
|                           | <b>4a</b> | -1174.7880138 | 1.071                 | -1174.7850553 | 2.037                 | -672.7      |

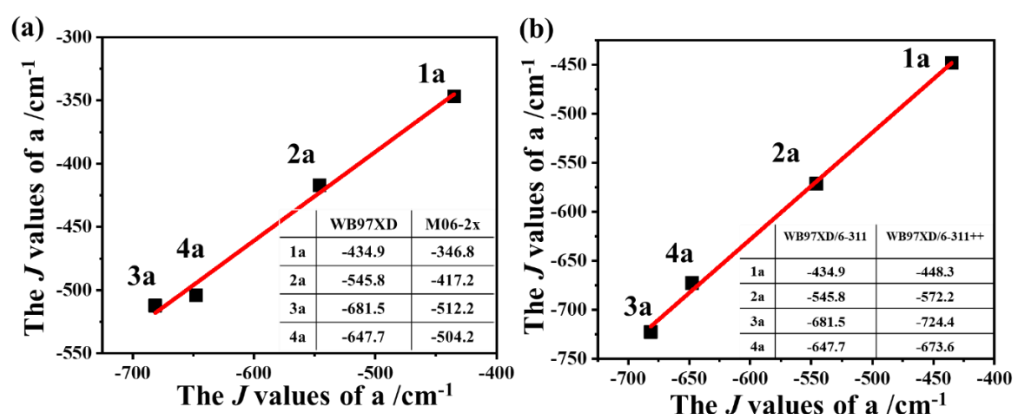

Figure S1. (a) A linear correlation between the  $J$  values of **a** at the (U)WB97XD/6-311G (d, p) and (U)M06-2X/6-311G (d, p) levels. (b) A linear correlation between the  $J$  values of **a** at

the (U)WB97XD/6-311G (d, p) and (U)WB97XD/6-311++G (d, p) levels.

### 3. The geometry character of diradicals

| Molecules | $\theta/^\circ$ | $\cos^2\theta$ | $d_{(C-N)}/\text{\AA}$ | $d_{(N\cdots N)}/\text{\AA}$ | $d_{(C-X)}/\text{\AA}$ | Dihedral angle/ $^\circ$ |
|-----------|-----------------|----------------|------------------------|------------------------------|------------------------|--------------------------|
| 1a        | 0               | 1.000          | 1.392                  | 9.847                        | —                      | 0                        |
| 1b        | 0               | 1.000          | 1.392                  | 9.848                        | —                      | 0                        |
| 2a        | 29.2            | 0.762          | 1.390                  | 8.880                        | 1.544                  | 5.13                     |
| 2b        | 29.3            | 0.761          | 1.387                  | 8.890                        | 1.545                  | -5.13                    |
| 3a        | 34.2            | 0.684          | 1.387                  | 8.724                        | 1.407                  | 1.42                     |
| 3b        | 35.3            | 0.666          | 1.375                  | 8.557                        | 1.413                  | -1.43                    |
| 4a        | 37.9            | 0.623          | 1.383                  | 8.338                        | 1.391                  | 7.77                     |
| 4b        | 39.1            | 0.602          | 1.380                  | 8.447                        | 1.392                  | -7.75                    |

### 4. The ground state spin density distribution (isovalue =0.001) of the diradicals.

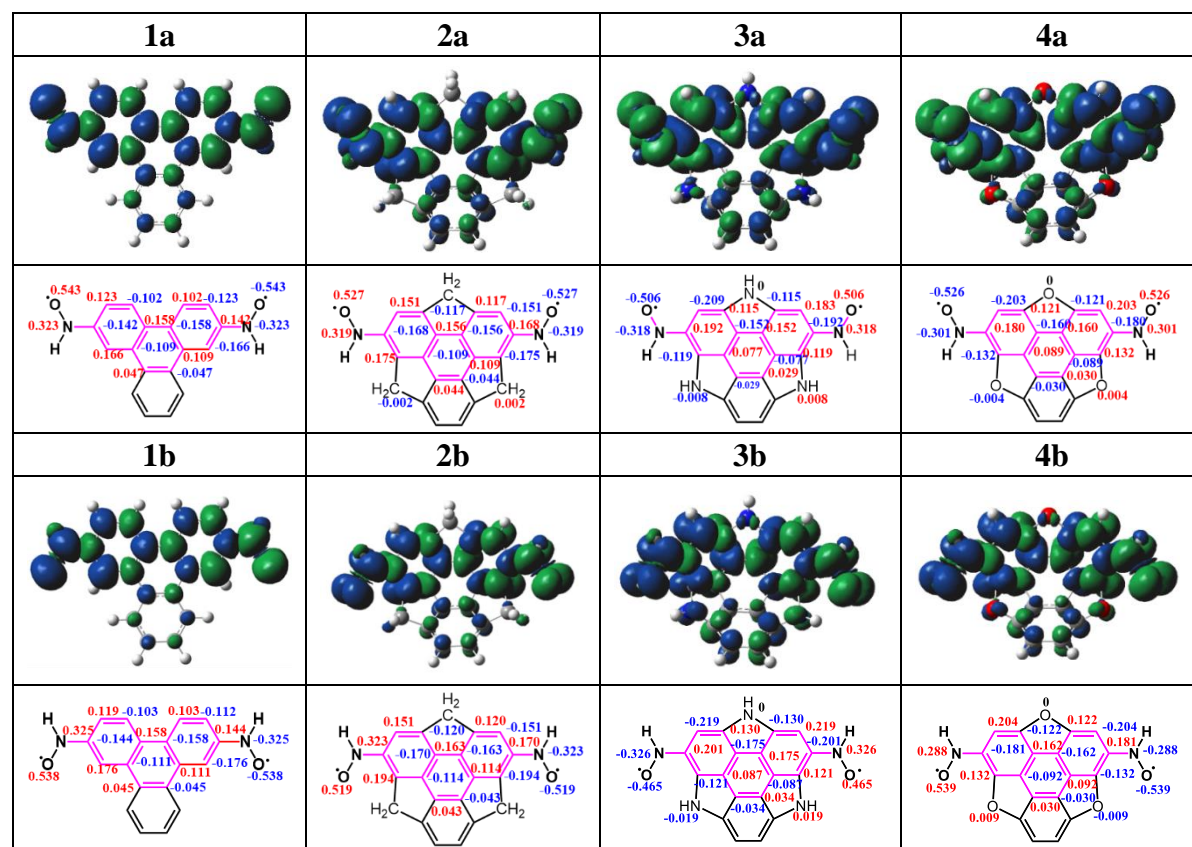

### 5. SOMO ( $\alpha, \beta$ ) (isovalue =0.02)

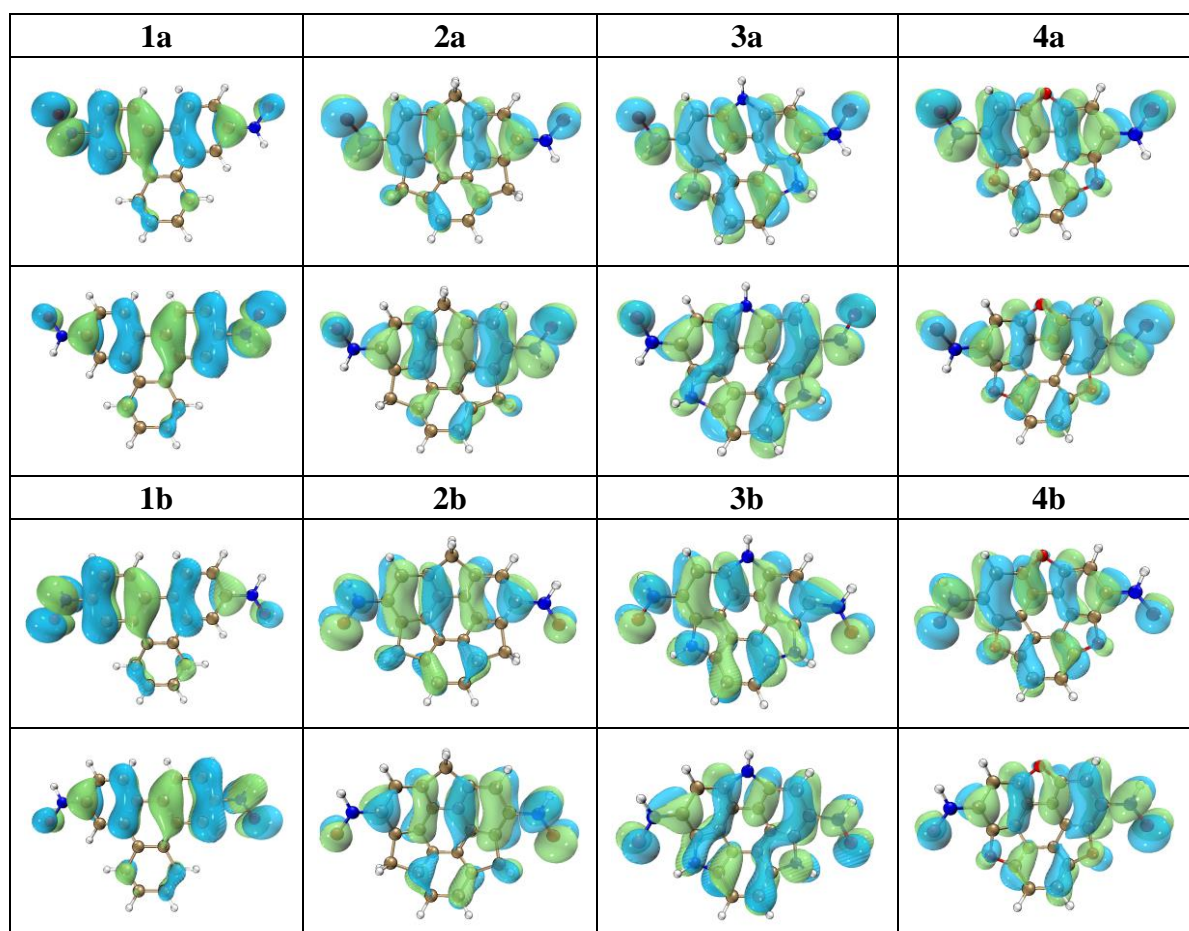

### 6. AV1245 value of benzene ring in diradicals.

| Molecules  | left       | right     | below      | middle    |
|------------|------------|-----------|------------|-----------|
| <b>1a</b>  | 8.9661482  | 8.9674485 | 12.0505648 | 1.7509438 |
| <b>1b</b>  | 8.9572431  | 8.9577971 | 12.0563530 | 1.6936870 |
| <b>2a</b>  | 7.5985271  | 7.6002653 | 10.8370851 | 1.3433154 |
| <b>2b</b>  | 7.3921811  | 7.3931996 | 10.7798020 | 1.3312120 |
| <b>3a</b>  | 5.3100775  | 5.3079867 | 8.1179833  | 1.1205044 |
| <b>3b</b>  | 4.1822512  | 4.1822403 | 7.1744050  | 1.2905020 |
| <b>4a</b>  | 6.0958194  | 6.0963494 | 9.2114945  | 0.7984385 |
| <b>4b</b>  | 6.01761431 | 6.0170917 | 8.8828115  | 0.8126150 |
| <b>2a'</b> | 8.0989954  | 8.1008082 | 11.3386427 | 1.6983248 |
| <b>3a'</b> | 7.9783487  | 7.9782810 | 11.3756971 | 1.4826711 |
| <b>4a'</b> | 7.49998761 | 7.5005885 | 11.0312446 | 1.5147055 |

## 7. Orbital energy of the diradicals in the CS state.

| Molecules | $E_{(\text{HOMO})}/\text{a.u.}$ | $E_{(\text{LUMO})}/\text{a.u.}$ | Energy Gap/eV |
|-----------|---------------------------------|---------------------------------|---------------|
| <b>1a</b> | -0.22684                        | -0.07278                        | 4.192         |
| <b>2a</b> | -0.22656                        | -0.06542                        | 4.385         |
| <b>3a</b> | -0.22837                        | -0.05310                        | 4.769         |
| <b>4a</b> | -0.24577                        | -0.07430                        | 4.666         |
